# Supplementary material for: Biallelic Loss-of-Function Variants in BICD1 Are Associated with Peripheral Neuropathy and Hearing Loss
Source: MDPI journal article supplement (doi:10.3390/ijms24108897), 2023-05-17
Supplement: s1 [file s1]

## Supplementary Figures

Supplementary Figure 1

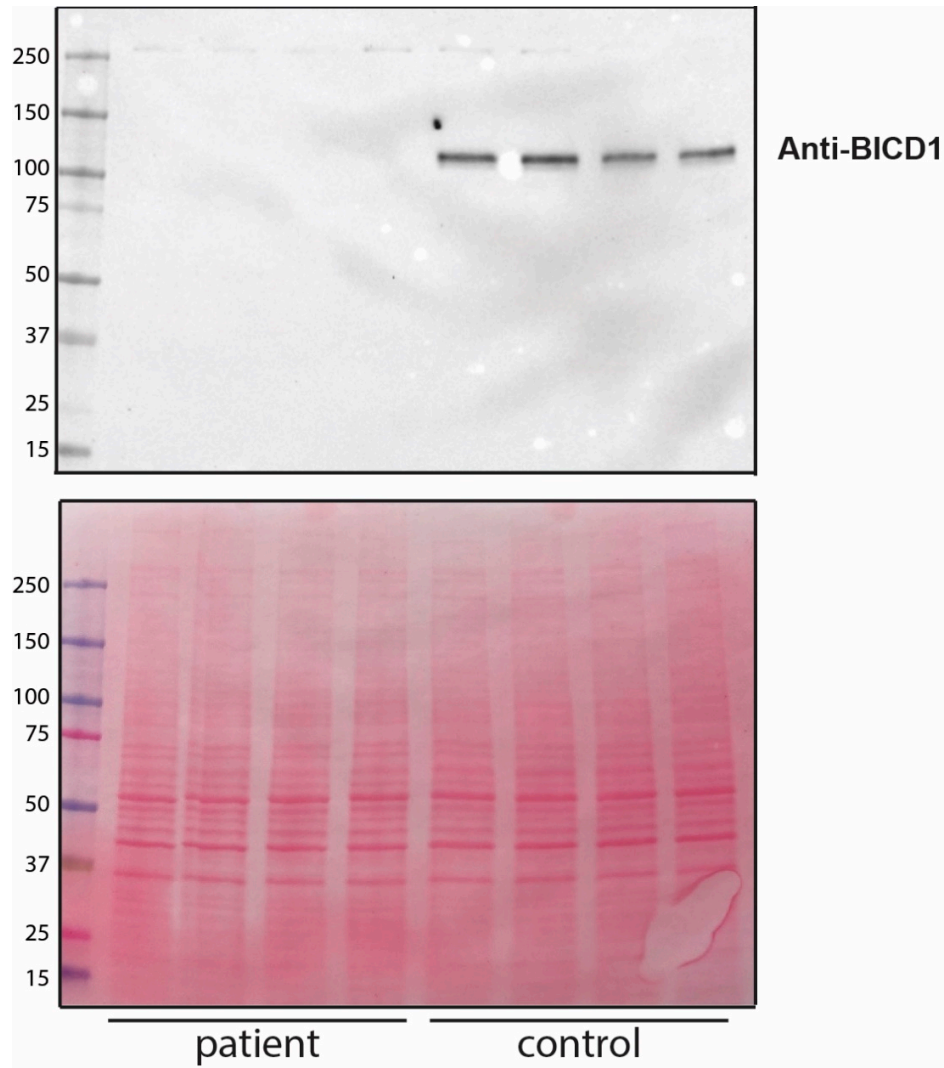

**Figure S1.** Ponceau-S staining of western blot featured in Figure 2.

Supplementary Figure 2

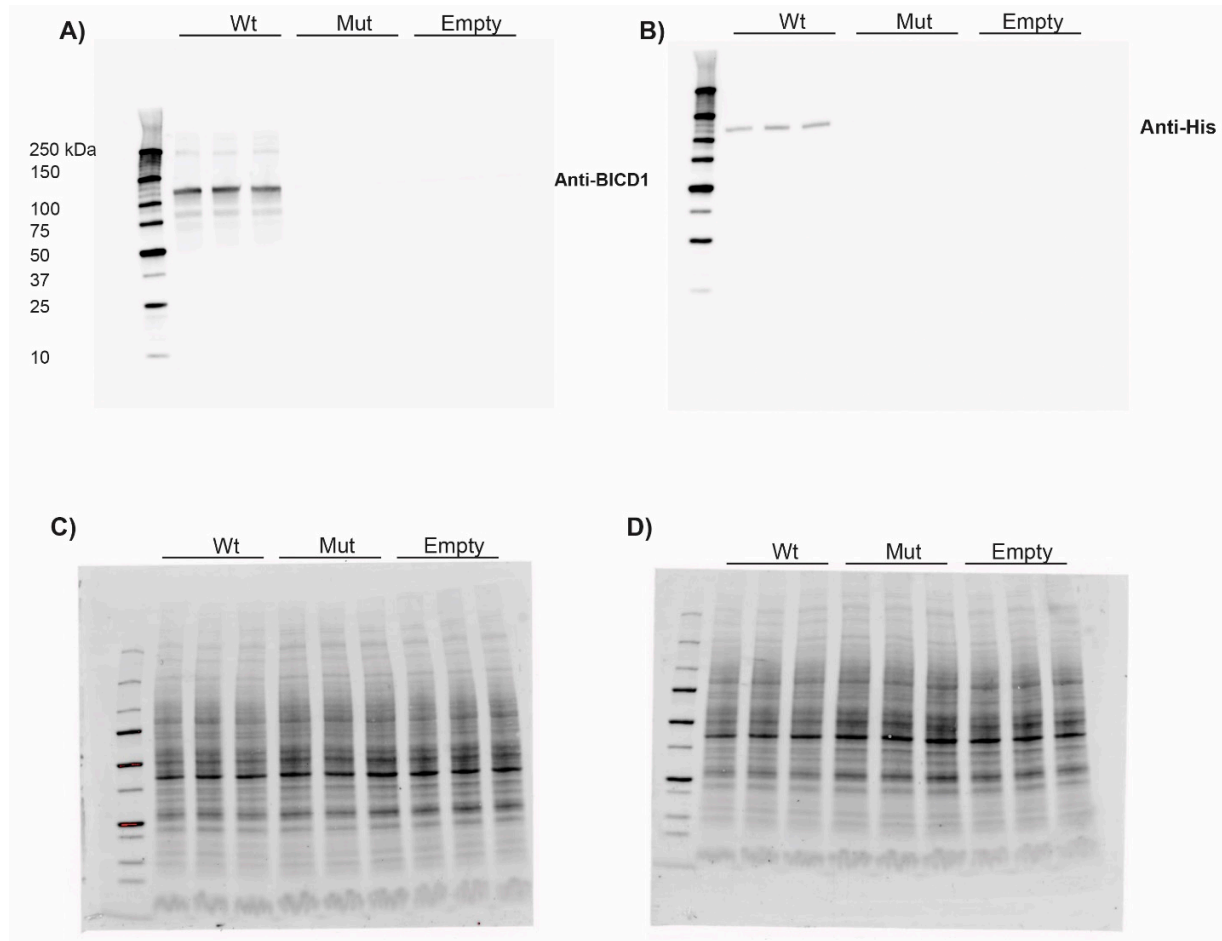

**Figure S2.** Western blot of His-BICD1 wildtype and mutant from COS7 lysates. Anti-BICD1 stained blot (A) and Anti-His stained (B). Whole protein imaging (C and D) of Anti-BICD1 blot and Anti-His blot, respectively. Note, no detection of the mutant BICD1. Protein maker Precision Plus Protein™ Unstained Protein Standards (Biorad).
